# Supplementary material
Source: PubMed Central journal article supplement (PMC2214687)
Supplement: JCI0832601sd.pdf [file JCI0832601sd.pdf]

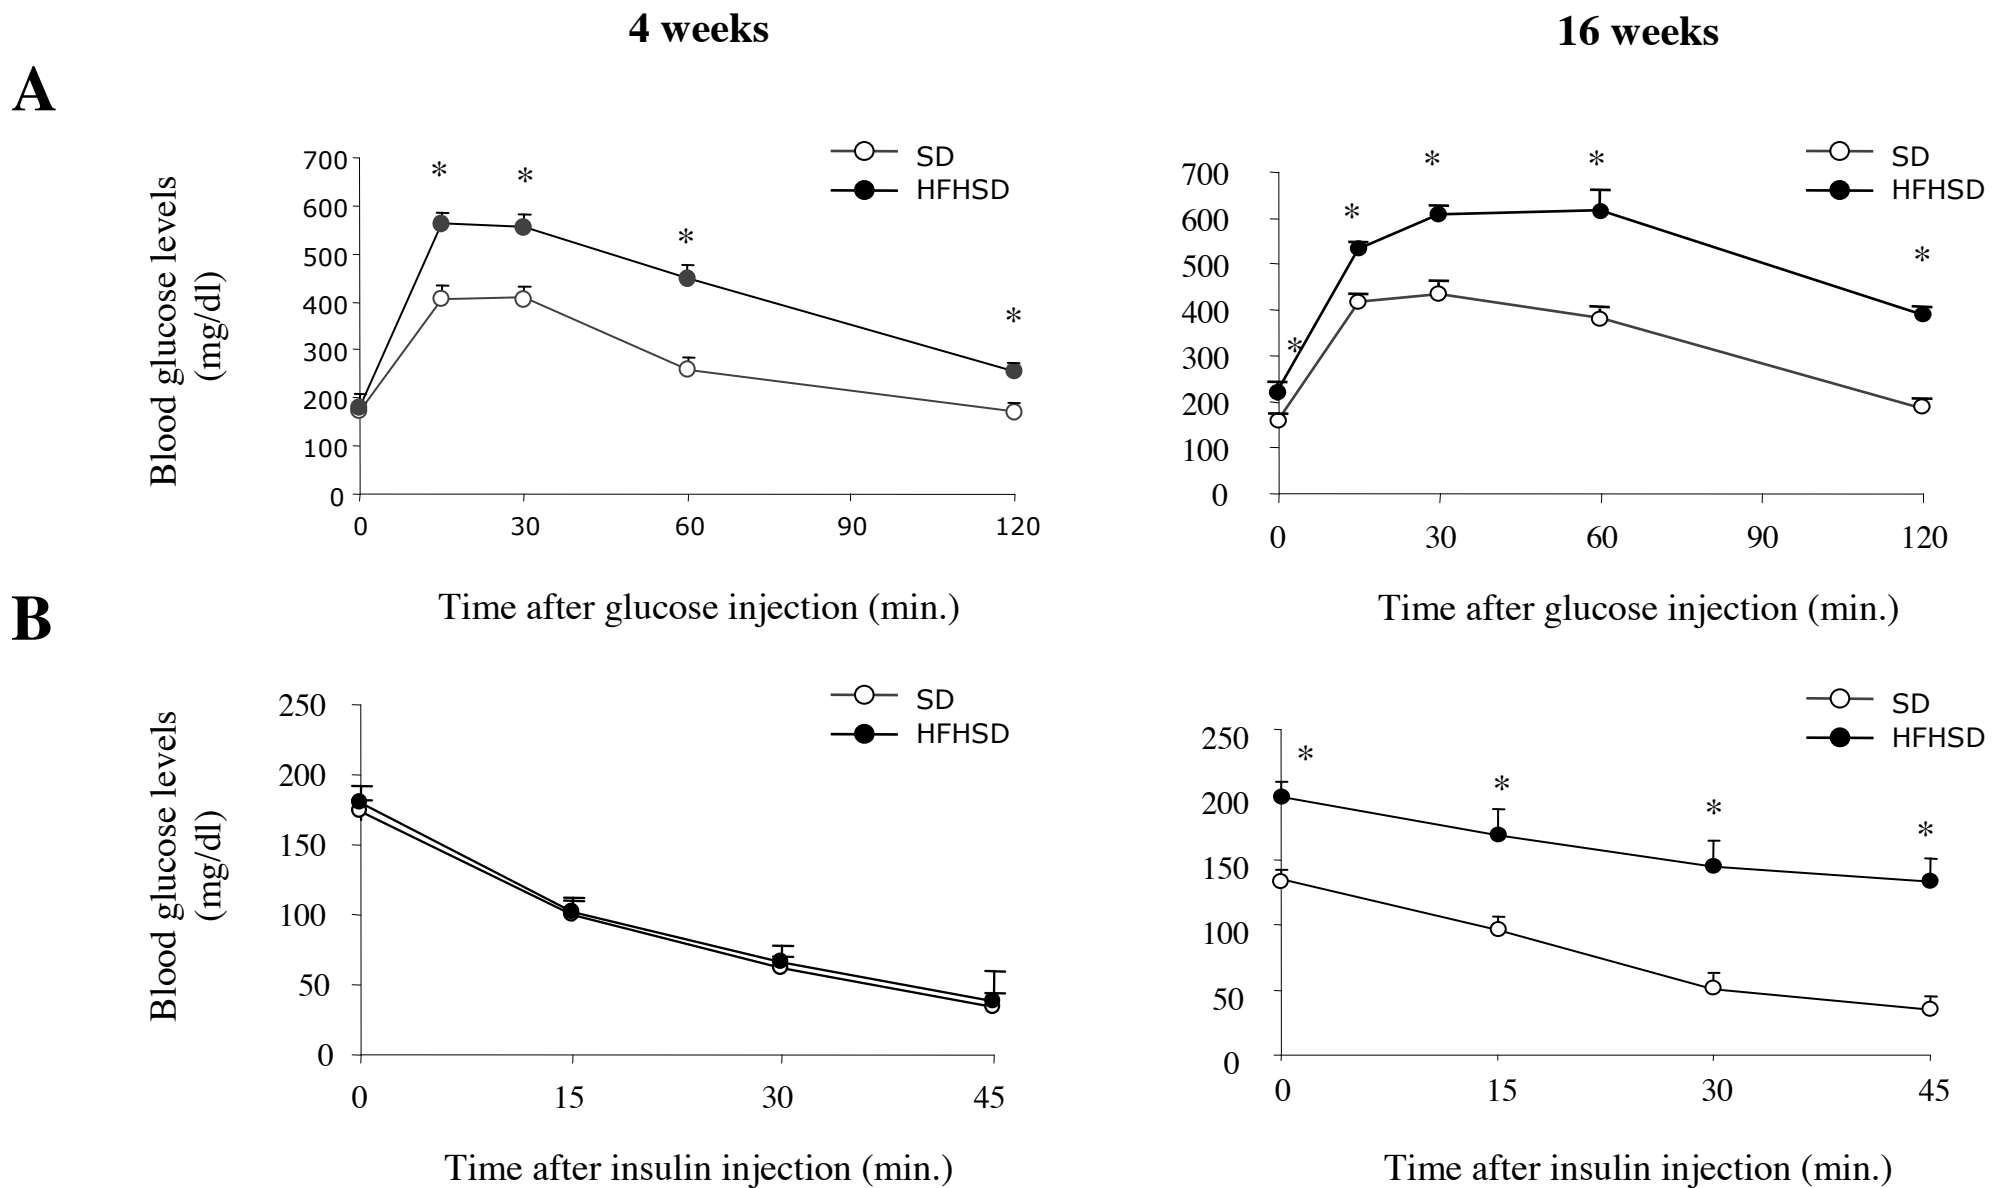

**Figure S1: Systemic insulin sensitivity in SD and HFHSD mice.** Intraperitoneal glucose (A) and insulin (B) tolerance tests in 6h fasted SD (white circles) and HFHSD (black circles) mice, after 4 (left panel) and 16 (right panel) weeks of diet. Animals were injected intraperitoneally with 2mg/g body weight of glucose or 0.75mU/g body weight of insulin. Data represent the means  $\pm$  sem of 6-16 mice. \*  $p < 0.01$  vs SD.

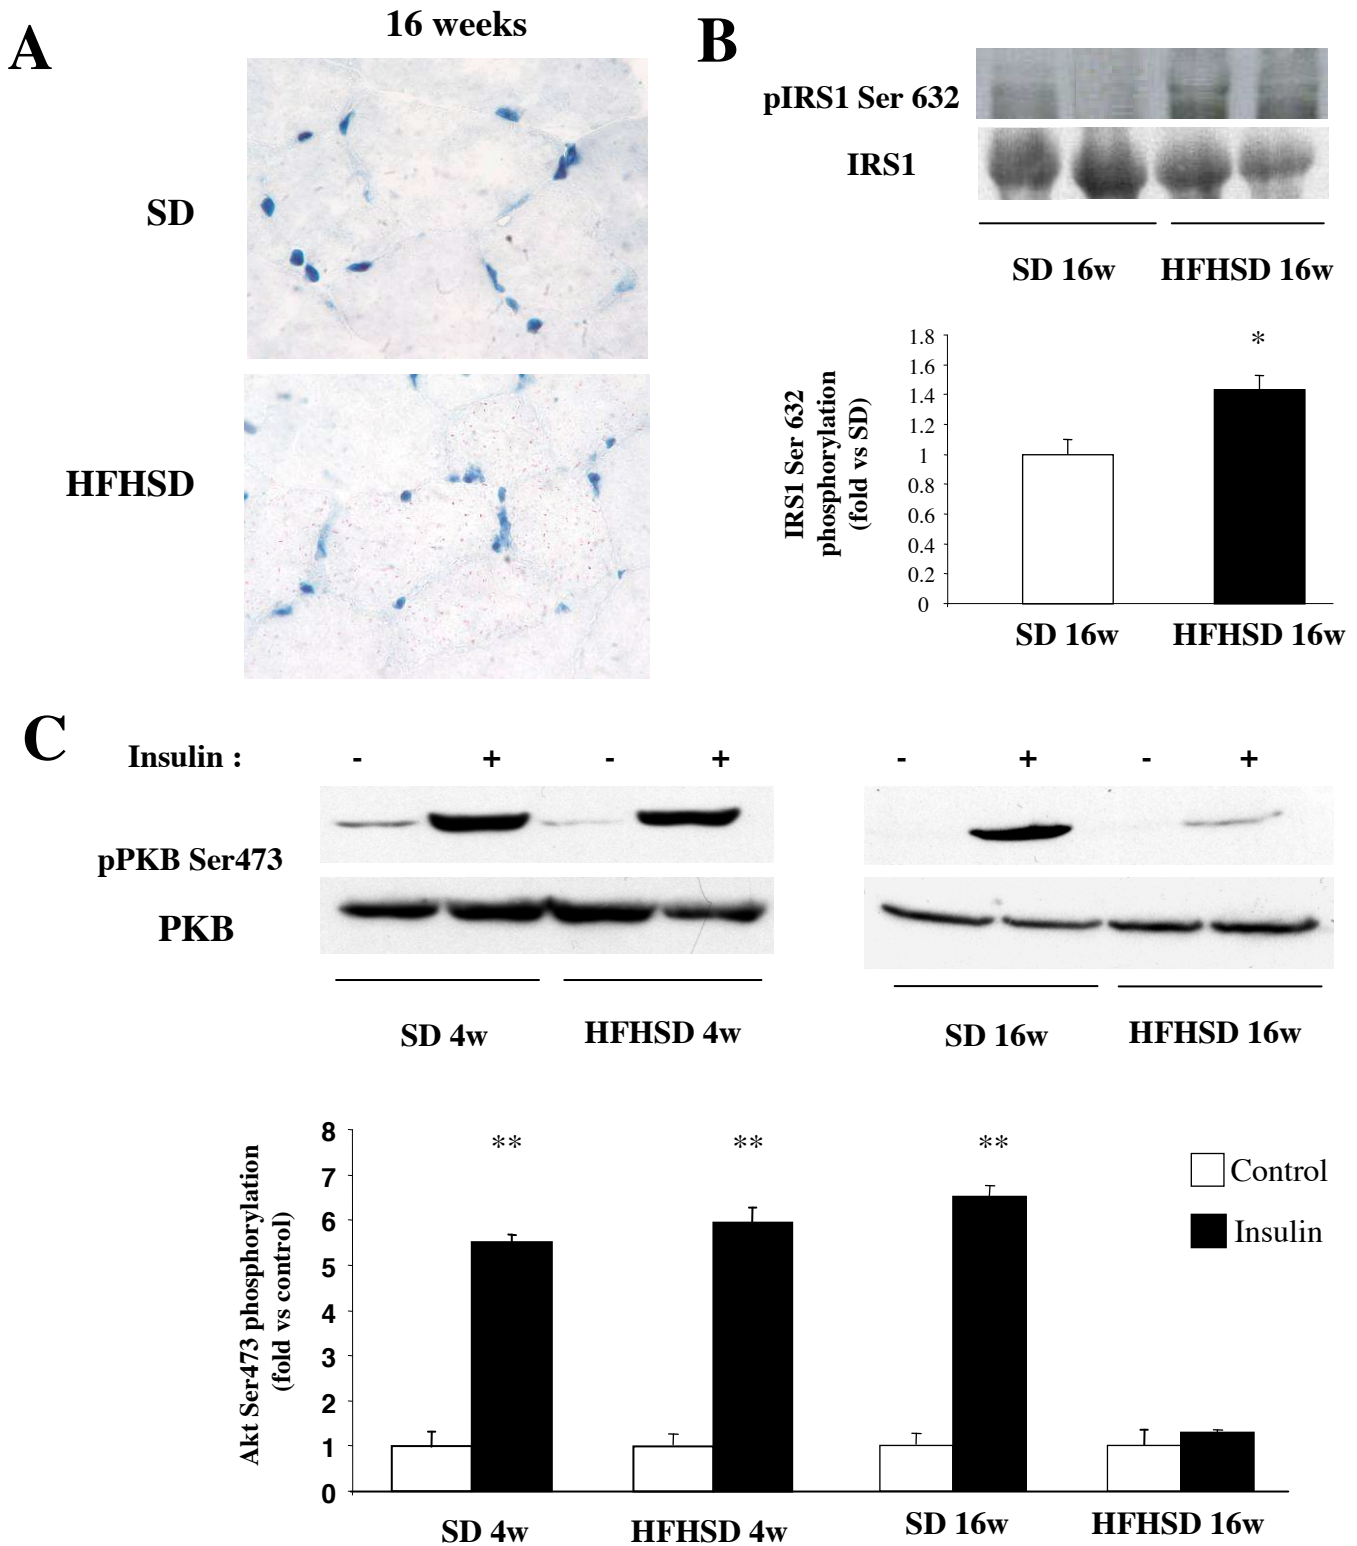

**Figure S2: Altered insulin responsiveness in skeletal muscle of 16 week HFHSD mice.** A: Oil Red O staining of gastrocnemius muscle from 16 week SD and HFHSD mice. B: Basal IRS1 phosphorylation on serine 632 in gastrocnemius muscle of 16 week SD and HFHSD mice. IRS1 phosphorylation was normalized to total IRS1 protein expression. C: Insulin-stimulated Akt phosphorylation on serine 473, measured on muscle fragments incubated ex vivo in the absence or in the presence of insulin ( $10^{-7}$  M) for 15 minutes. Akt phosphorylation was normalized to total Akt protein expression. Results are expressed as fold increase over insulin-free basal conditions (n=3). \*  $p < 0.05$ , \*\*  $p < 0.01$ .

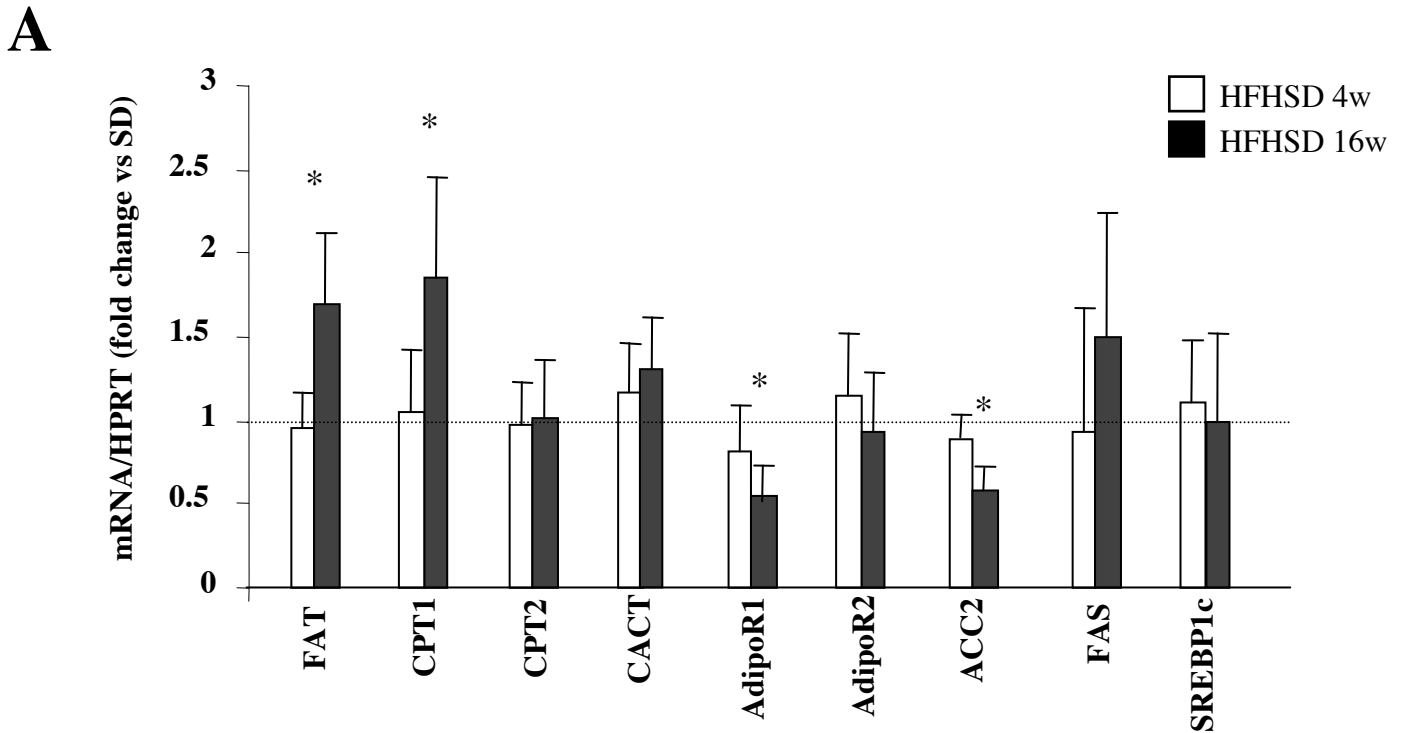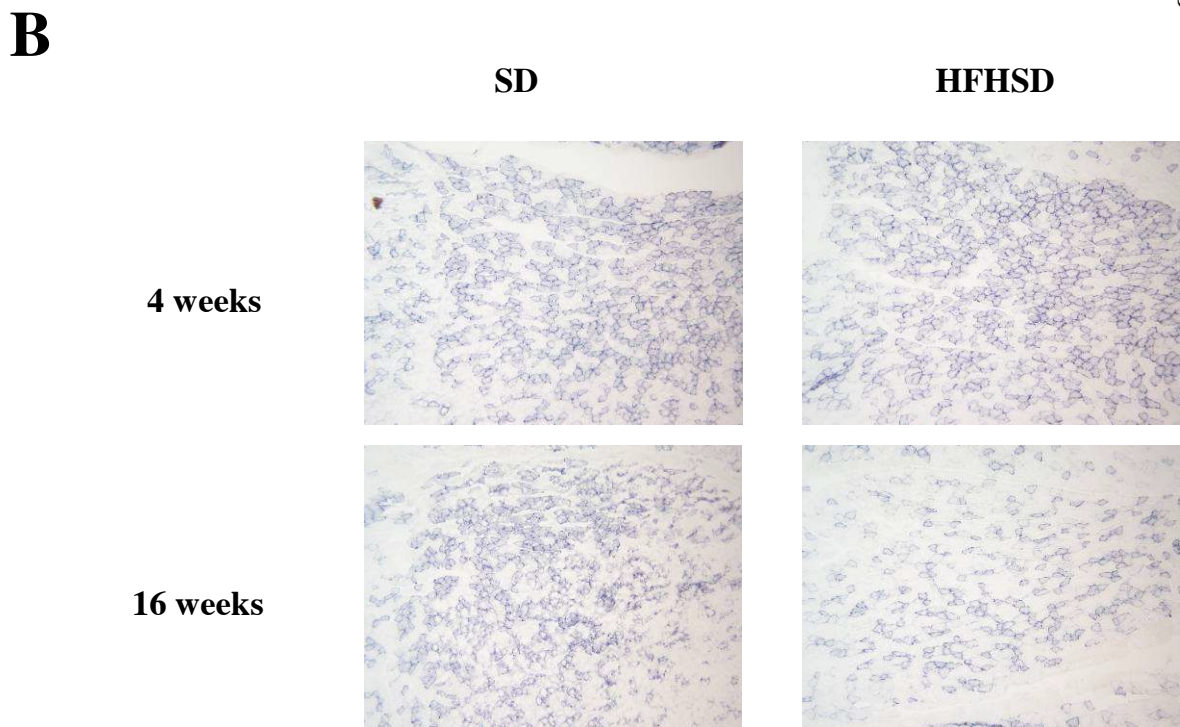

**Figure S3: Oxidative and lipid metabolisms in muscle of SD and HFHSD mice.** A: mRNA levels of lipid metabolism genes, determined by real-time RT-PCR, in gastrocnemius muscle of SD and HFHSD mice, After 4 and 16 weeks of diet (n=6). Results are expressed relative to SD condition (dotted line). \* p< 0.05. B: Succinate dehydrogenase staining of gastrocnemius muscle from 4 and 16 week SD and HFHSD mice. Images have been taken in the deep gastrocnemius muscle of mice, which has a higher proportion of slow twitch fibers.

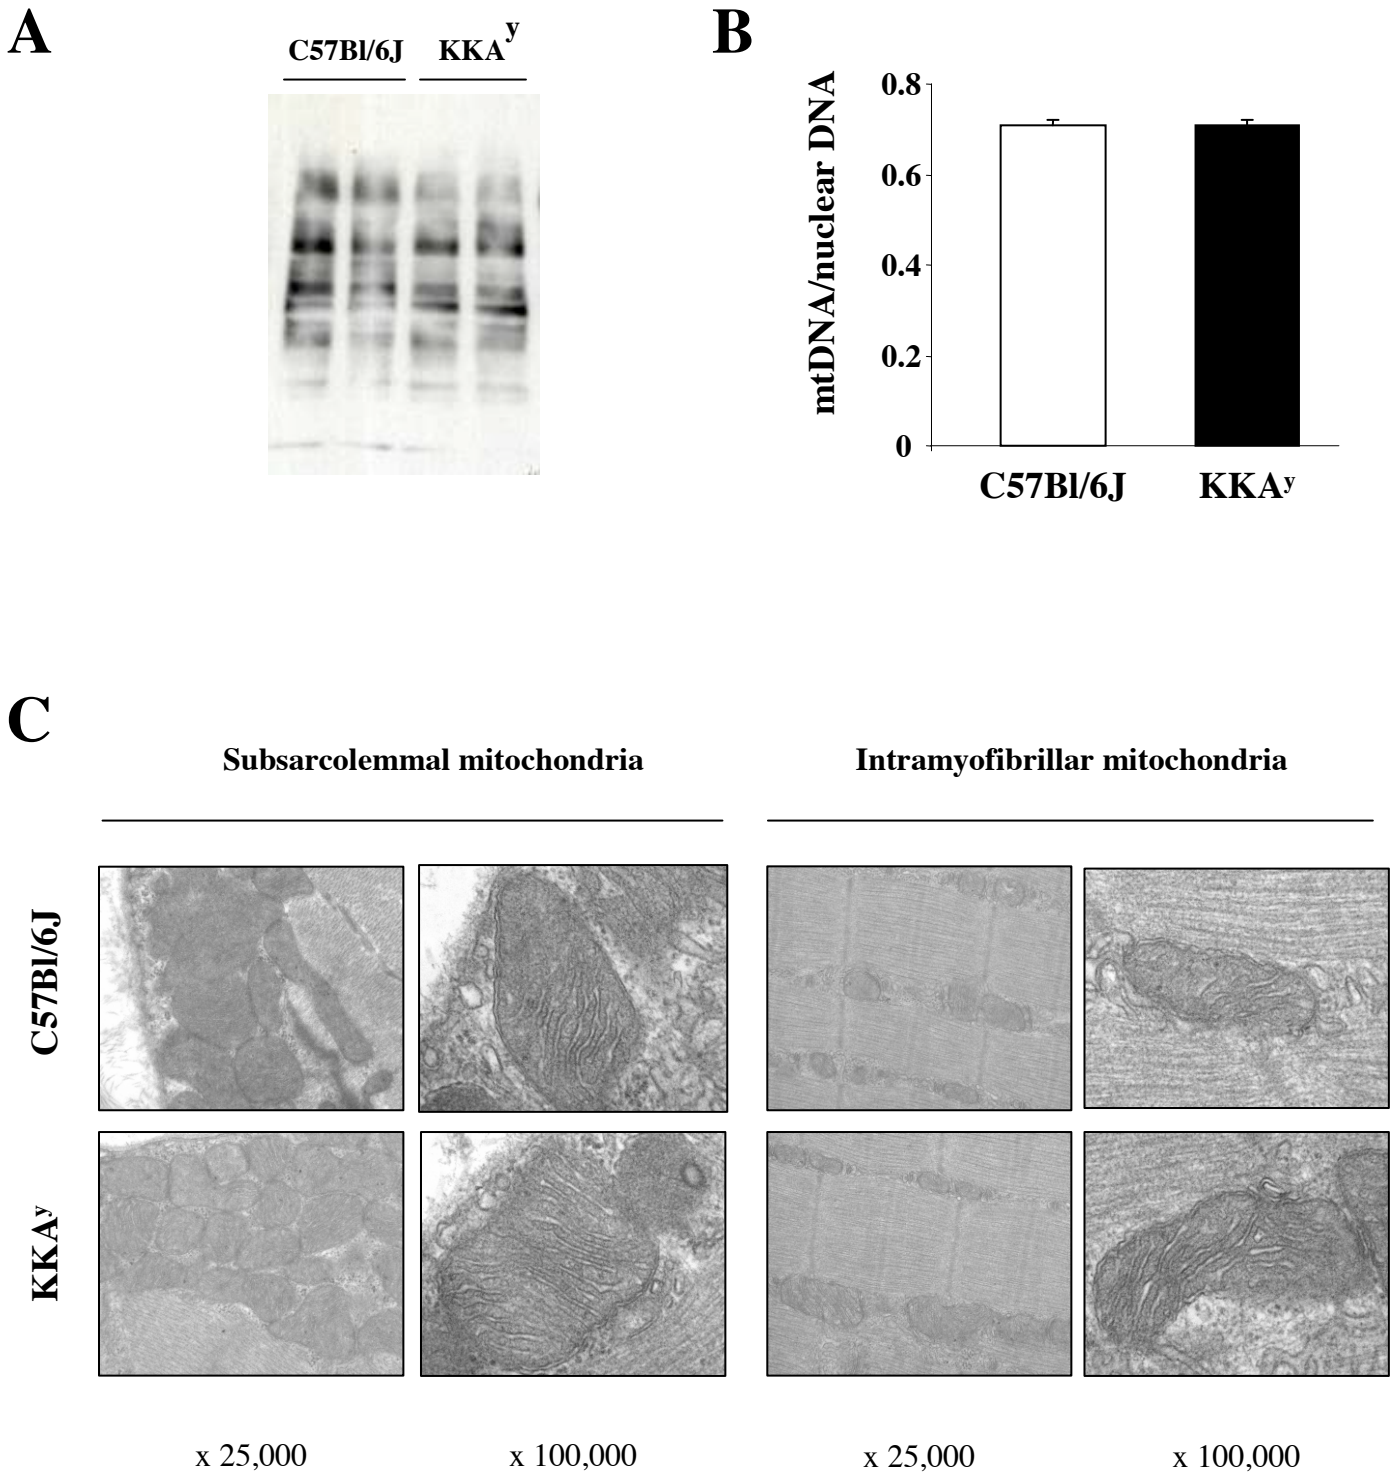

**Figure S4: Lack of muscle oxidative stress and mitochondrial alterations in KKA<sup>y</sup> mice.** A- Immunoblots showing total protein carbonylation in gastrocnemius muscle of C57Bl/6J and KKA<sup>y</sup> mice. B- mtDNA levels, determined by real time PCR, in skeletal muscle of C57Bl/6J and KKA<sup>y</sup> mice (n=6). mtDNA copy number was calculated as the ratio of COX1 to cyclophilin A. C- Transmission electronic microscopy images (magnification x25,000 and x100,000) of subsarcolemmal and intermyofibrillar mitochondria in gastrocnemius muscle of C57Bl/6J and KKA<sup>y</sup> mice.

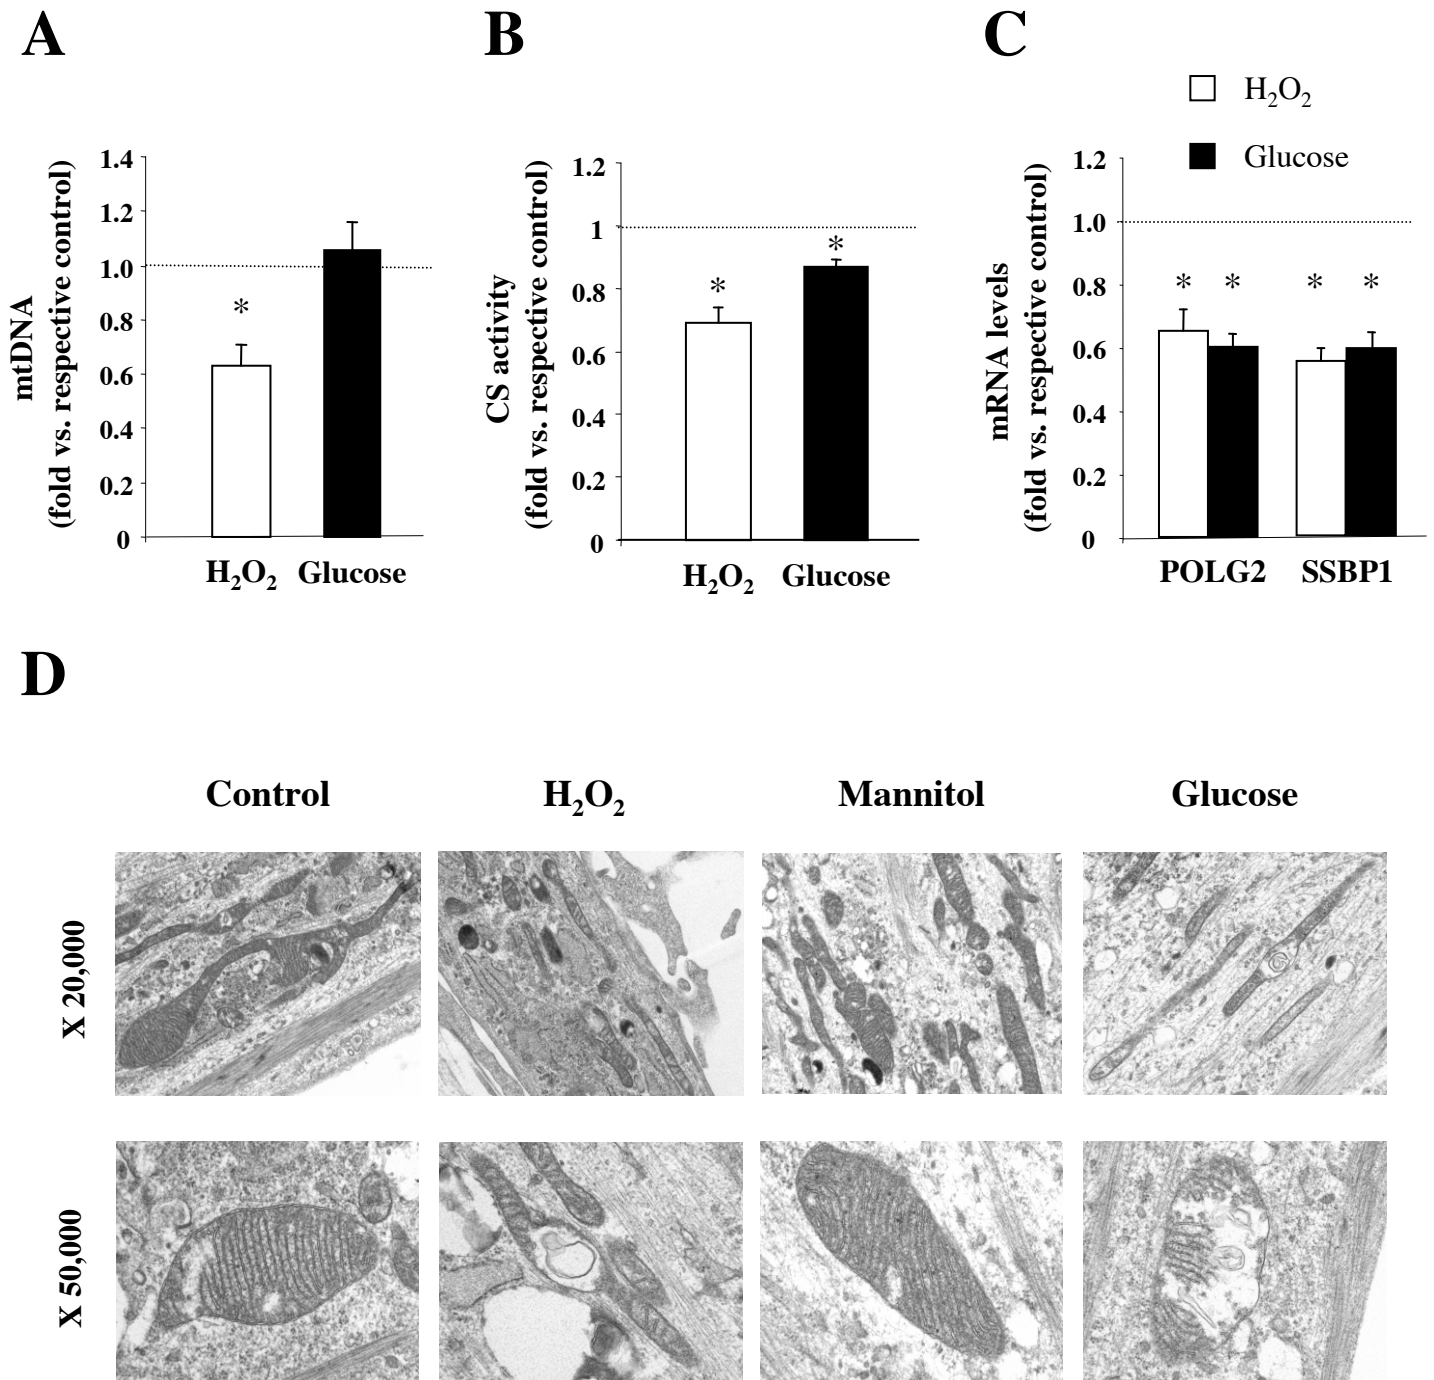

**Figure S5: Effects of ROS on mitochondria density, structure and function in human myotubes.**  
 A: mtDNA copy number from myotubes treated for 96 hours with H<sub>2</sub>O<sub>2</sub> (0.1mM) and glucose (25mM).  
 B: Citrate synthase (CS) activity measured in total lysates of myotubes treated with H<sub>2</sub>O<sub>2</sub> (0.1mM) and glucose (25mM) for 96 hours. C: mRNA levels of POLG2 and SSBP1 genes, determined by real-time RT-PCR, in H<sub>2</sub>O<sub>2</sub> and glucose-treated myotubes for 96 hours. D- Transmission electronic microscopy images (magnification x 20,000 and x 50,000) of mitochondria in human myotubes treated or not with H<sub>2</sub>O<sub>2</sub> and glucose for 96 hours. Mannitol (25mM) is added as control for glucose treatment. All results are expressed relative to untreated cells (dotted line) (n=3 in triplicate). \* p<0.05.

**Table S1 : Metabolic characteristics of age-matched C57Bl/6J control and KKA<sup>y</sup> mice.**

|                                    | <b>C57Bl/6J</b> | <b>KKA<sup>y</sup></b>    |
|------------------------------------|-----------------|---------------------------|
| Body weight (g)                    | 22.7 ± 0.5      | 28 ± 0.8 <sup>**</sup>    |
| Fat weight (g)                     | 0.39 ± 0.02     | 0.81 ± 0.07 <sup>**</sup> |
| Glucose (mg/dl)                    | 166.8 ± 6.3     | 304.3 ± 46 <sup>**</sup>  |
| Insulin (ng/ml)                    | 0.51 ± 0.04     | 3.83 ± 1.2 <sup>*</sup>   |
| TG (g/l)                           | 0.85 ± 0.05     | 3.29 ± 0.4 <sup>**</sup>  |
| FFA (mM)                           | 0.1 ± 0.02      | 0.14 ± 0.01               |
| H <sub>2</sub> O <sub>2</sub> (μM) | 61.9 ± 7        | 85.4 ± 4.8 <sup>*</sup>   |

Data represent the means ± sem of 10 mice per group.

\* p<0.05, \*\* p<0.001 vs the control mice.

**Supplemental Table 2 : Sequences of primers used for real-time PCR.**

| <b>Genes</b>                   | <b>Forward primer</b>                | <b>Reverse primer</b>                    |
|--------------------------------|--------------------------------------|------------------------------------------|
| <b>COX1*</b>                   | 5'-TGC TTA CAC CAC ATG AAA CA-3'     | 5'-TTTTTTTTTTTTTTTTTTTTTTTTTTTTTATTTT-3' |
| <b>COX3*</b>                   | 5'-GAA GCC GCA GCA TGA TAC TG-3'     | 5'-TTTTTTTTTTTTTTTTTTTTTTTTTTAAGATC-3'   |
| <b>PGC1<math>\alpha</math></b> | 5'-TCC TCT GAC CCC AGA GTC AC-3'     | 5'-CTT GGT TGG CTT TAT GAG GAG G-3'      |
| <b>PGC1<math>\beta</math></b>  | 5'-GGA AGC GGC GGG AAA AGG CC-3'     | 5'-GCT GTC AAA ATC CAT GGC TTC-3'        |
| <b>NRF1</b>                    | 5'-GCT GCT GC GTG GCA ACA GG-3'      | 5'-TTG GGT TTG GAG GGT GAG AT-3'         |
| <b>NRF2</b>                    | 5'-CCA AGT CCT GCA TTG GGT GG-3'     | 5'-GCA AAA ACT GCC ATA GTT GG-3'         |
| <b>mtTFA</b>                   | 5'-GCT TGG AAA ACC AAA AAG AC-3'     | 5'-CCC AAG ACT TCA TTT CAT T-3'          |
| <b>ERR<math>\alpha</math></b>  | 5'-GGT GTG GCA TCC TGT GAG GC-3'     | 5'-AGG CAC TTG GTG AAG CGG CA-3'         |
| <b>Mfn2</b>                    | 5'-AAG CAC TTT GTC ACT GCC AAG-3'    | 5'-TTG TCC CAG AGC ATG GCA TTG-3'        |
| <b>POLG1</b>                   | 5'-GCG GCT GGT GGA AGA GCG TT-3'     | 5'-GAG ATG GCC ATG TGC ATG CTC-3'        |
| <b>POLG2</b>                   | 5'-CAC TAT GTT AAT TGC CTG G-3'      | 5'-CCA GAA ATC AAG CCA CTG G-3'          |
| <b>SSBP1</b>                   | 5'-CGT CAG TTT GTA AGA CAT GAG-3'    | 5'-CCC CTG ATC GCC ACA TCT C-3'          |
| <b>FAT/CD36</b>                | 5'-TGA TGA TGA ACA GCA GCA ACA T 3'  | 5'-AGA CTG TGT TGT CCT CAG CG-3'         |
| <b>CPT1</b>                    | 5'-TAT AAC AGG TGG TTT GAC A-3'      | 5'-CAG AGG TGC CCA ATG ATG-3'            |
| <b>UCP2</b>                    | 5'-CTA CTG TCG AGG AGA TCG AG -3'    | 5'-GCA GCA GTT TGG GTT GTT TC-3'         |
| <b>UCP3</b>                    | 5'-CCT ACA GAA CCA TCG CCA GG -3'    | 5'-ACC GGG GAG GCC ACC ACT GT-3'         |
| <b>Gp91</b>                    | 5'-TTG GGT CAG CAC TGG CTC TG -3'    | 5'-TGG CGG TGT GCA GTG CTA TC -3'        |
| <b>p22</b>                     | 5'-GTC CAC CAT GGA GCG ATG TG-3'     | 5'-CAA TGG CCA AGC AGA CGG TC -3'        |
| <b>p67</b>                     | 5'-CTG GCT GAG GCC ATC AGA CT -3'    | 5'-AGG CCA CTG CAG AGT GCT TG -3'        |
| <b>p40</b>                     | 5'-GCC GCT ATC GCC AGT TCT AC -3'    | 5'-GCA GGC TCA GGA GGT TCT TC -3'        |
| <b>p47</b>                     | 5'-GAT GTT CCC CAT TGA GGC CG -3'    | 5'-GTT TCA GGT CAT CAG GCC GC -3'        |
| <b>GSR</b>                     | 5'-GGG TGG CAC TTG CGT GAA TG -3'    | 5'-TTC AGG CGG CTC ACA TAG GC -3'        |
| <b>GPx</b>                     | 5' GTG AGC CTG GGC TCC CTG CG 3'     | 5' ACT TGA GGG AAT TCA GAA TC 3'         |
| <b>CAT</b>                     | 5'-TCA GGA TGT GGT TTT CAC TG -3'    | 5'-GTG TAA AAT TTC ACT GCA AAC -3'       |
| <b>SOD2</b>                    | 5' TCA TGC AGC TGC ACC ACA GC-3'     | 5' CCA TTG AAC TTC AGT GCA GG-3'         |
| <b>Prdx3</b>                   | 5'-GAC ATA CTG TGG TCT GCC TCT GC-3' | 5'-CCT TTA AAA TAG GGC GCG TG -3'        |
| <b>Prdx5</b>                   | 5'-ACA CCT GGC TGT TCT AAG ACC C-3'  | 5'-TCA TTA ACG CTC AGA CAG GCC-3'        |
| <b>CS</b>                      | 5'-CCA TCC ATA GTG ACC ATG AG-3'     | 5'-CTT TGC CAA CTT CCT TCT GT-3'         |

\* Since mitochondria-encoded genes have not intron, and to ensure that we amplify only mRNA, we have used a reverse primer which is localized on poly A RNA.
